# Supplementary material
Source: MDPI journal article supplement (https://www.mdpi.com/1996-1073/14/2/328)
Supplement: s1 [file s1]

## Sheet: Overview
	Benchmark
	Hersteller	Modell	Power kW (rated)	Peak Torque Nm	Topology	Topology	Gears	No. Of EM	EM Power (rated)	EM Torque	Type	Motormap erstellt	Sources
	DAF	CF Electric	210	2000	4x2	Central motor	1	1	210	2000	PSM	yes	[29, 30]
	Axletech	EPS785	350	3500	4x2 / 6x4	Central motor	1	1	350	3500	?	no	[28]
	Meritor	17xe	450	2000	4x2 / 6x4	Central motor	2-3	1	450	2000	?		[33]
	Hyundai	xCient Fuel Cell	350	3400	4x2	Central motor	6	1	350	3400	?	no	[32]
	Scania	L	230	1300	4x2 / 6x4	Central motor	2	1	230	1300	?	no	[31]
	ZF	AxTrax	120	970	4x2 / 6x4	Distributed	1	2	60	485	ASM	yes	[13, 34, 35, 36]
	Nikola	Two	745	2711	4x2 / 6x4	Distributed	1	4	186.25	677.75	?		[37]
	Tesla	Semi	892	2980	6x4	Distributed	1	4	223	745	PSM	yes	[38]
	E-Force	EF18 SZM	300	4050	4x2	Dual Central motor	3	2	150	2025	HSM	yes	[39, 40, 41]
	Alisson	AXE	800		4x2 / 6x4	Dual Central motor	2	2	400	0	?		[42, 43]
	Ansorge	Elias	280	2500	4x2	Dual Central motor	12	2	140	1250	PSM		[44]
	Nikola	Tre	480	1800	4x2 / 6x4	Dual Central motor	1	2	240	900	PSM	yes	[45, 46, 47]
	General Assumption
	Voltage	800V
	n_85kmh	504.971
	r_tire	0.47
	r_tire,dyn.	0.95
	Comments
	Assumption: Siemens 1DB2022-WS36: http://dtsheet.com/doc/1803684/elfa-data-sheets
	Assumption: powerMELA duo280: https://www.stw-mobile-machines.com/case-studies/detail/elias/?fbclid=IwAR3QMFDqWCQm7qLOwmoiONLmR77do2UDsVe281-1UqQmYfBgtCj0fRVV2z0
	ATM 4500R – by Allison, 6 fwd. speeds, 1 reverse speed, with 4.875 final-drive

## Sheet: DAF
DAF CF Electric
Parameter	Symbol	Value	Unit	Annotation
Machine type	-	PSM	-
Power (rated)	P_N	210	kW
rot. Velocity (rated)	n_N	8836.99	1/min	In tool: 8837
Voltage (rated)	U_N	800V	V	Assumption
Torque (max)		2000
Assumptions	Symbol	Value	Unit	Annotation
Pole pairs	p	4	-	2-5 -> https://www.ew.tu-darmstadt.de/media/ew/vorlesungen_4/vorlesungmotordevelopementforelectricaldrivesystems/ss_14/Folie_MD_1_5_english.pdf												high pole number machines are typically used for low speed applications ->						https://www.mdpi.com/1996-1073/11/1/128/pdf
rot. Velocity (max)	n_max	15464.7	1/min	15465
power factor	cos_phi	1	-
phase number	m	3	-	in reality 9, but due to limitations of the tool 3 assumed
Magnet arrangement	-	IPMSM(integrated)	-
Circuit-Wiring	-	Star	-	not Delta
Wire-type	-	Round-Wire	-	not Hair-Pin
Cooling Type	-	Liquid	-
Iron material	-	VACOFLUX50	-
Conductor material	-	Copper	-	not aluminum
Winding type	-	Single-Layer, integral-slot	-
No. Of. Machines	-	1	-
Direct Drive
Ratio DD	i_DD	17.5	-
n_85 rated	n_85	8836.99	rpm
Two Gear
Ratio Final Drive	i_FD	5	-	User Input, max 7	Naunheimer S. 109
Ratio First Gear	i_1	3.5	-
Ratio Sec. Gear	i_2	1	-	Gear with most efficiency
n_85_rated	n_85	2524.85	rpm

## Sheet: E-Force EF18 SZM
E-Force EF18 SZM
Parameter	Symbol	Value	Unit	Annotation
Machine type	-	?	-
Power (rated)	P_N	350	kW
rot. Velocity (rated)	n_N	2524.85	1/min	2525
Voltage (rated)	U_N	800V	V
Pole pairs	p	4	-
Torque (max)		3400
Assumptions	Symbol	Value	Unit	Annotation
rot. Velocity (max)	n_max	4418.5	1/min	4418
power factor	cos_phi	1	-
phase number	m	3	-
Magnet arrangement	-	IPMSM(eingelassen)	-
Circuit-Wiring	-	Star	-	not Delta
Wire-type	-	Round-Wire	-	not Hair-Pin
Cooling Type	-	Liquid	-
Iron material	-	VACOFLUX50	-
Conductor material	-	Copper	-	not aluminum
Winding type	-	Single-Layer, integral-slot	-
No. Of. Machines	-	1	-
Direct Drive
Ratio DD	i_DD	10.2941	-
n_85 rated	n_85	5198.23	rpm
Two Gear
Ratio Final Drive	i_FD	5	-	User Input, max 7	Naunheimer S. 109
Ratio First Gear	i_1	2.05882	-
Ratio Sec. Gear	i_2	1	-	Gear with most efficiency
n_85_rated	n_85	2524.85	rpm

## Sheet: Nikola Tre
Nikola Tre
Parameter	Symbol	Value	Unit	Annotation
Machine type	-	PSM	-
Power (rated)	P_N	223	kW	113
rot. Velocity (rated)	n_N	5930.87	1/min	2525
Voltage (rated)	U_N	800V	V
Pole pairs	p	4	-
Torque (max)		745
Assumptions	Symbol	Value	Unit	Annotation
rot. Velocity (max)	n_max	10379	1/min
power factor	cos_phi	1	-
phase number	m	3	-
Magnet arrangement	-	IPMSM(eingelassen)	-
Circuit-Wiring	-	Star	-	not Delta
Wire-type	-	Round-Wire	-	not Hair-Pin
Cooling Type	-	Liquid	-
Iron material	-	VACOFLUX50	-
Conductor material	-	Copper	-	not aluminum
Winding type	-	Single-Layer, integral-slot	-
No. Of. Machines	-	4	-
Direct Drive
Ratio DD	i_DD	11.745	-
n_85 rated	n_85	5930.87	rpm
Two Gear
Ratio Final Drive	i_FD	5	-	User Input, max 7	Naunheimer S. 109
Ratio First Gear	i_1	2.34899	-
Ratio Sec. Gear	i_2	1	-	Gear with most efficiency
n_85_rated	n_85	2524.85	rpm

## Sheet: Tesla Semi
Tesla Semi
Parameter	Symbol	Value	Unit	Annotation
Machine type	-	?	-	Model 3 Machine
Power (rated)	P_N	400	kW	DB: 124
rot. Velocity (rated)	n_N	5700	1/min	DB: 11000
Voltage (rated)	U_N	400	V	DB: 400	known Value
Pole pairs	p	3	-
Torque (max)		0		DB: 411
Assumptions	Symbol	Value	Unit	Annotation
rot. Velocity (max)	n_max	17900	1/min
power factor	cos_phi	1	-
phase number	m	3	-
Magnet arrangement	-	V-Form	-	known Value
Circuit-Wiring	-	Star	-	not Delta
Wire-type	-	Round-Wire	-	not Hair-Pin
Cooling Type	-	Liquid	-
Iron material	-	VACOFLUX50	-
Conductor material	-	Copper	-	not aluminum
Winding type	-	Single-Layer, integral-slot	-
No. Of. Machines	-	2	-
Direct Drive
Ratio DD	i_DD	#DIV/0!	-
n_85 rated	n_85	#DIV/0!	rpm
Two Gear
Ratio Final Drive	i_FD	5	-	User Input, max 7	Naunheimer S. 109
Ratio First Gear	i_1	#DIV/0!	-
Ratio Sec. Gear	i_2	1	-	Gear with most efficiency
n_85_rated	n_85	2524.85	rpm

## Sheet: ZF AxTrax
ZF AxTrax
Parameter	Symbol	Value	Unit	Annotation
Machine type	-	ASM	-
Power (rated)	P_N	60	kW
rot. Velocity (rated)	n_N	11361.8	1/min
Voltage (rated)	U_N	800V	V
Pole pairs	p	4	-
Torque (max)		485
Assumptions	Symbol	Value	Unit	Annotation
rot. Velocity (max)	n_max	19883.2	1/min
power factor	cos_phi	1	-
phase number	m	3	-
Magnet arrangement	-	IPMSM(eingelassen)	-
Circuit-Wiring	-	Star	-	not Delta
Wire-type	-	Round-Wire	-	not Hair-Pin
Cooling Type	-	Liquid	-
Iron material	-	VACOFLUX50	-
Conductor material	-	Copper	-	not aluminum
Winding type	-	Single-Layer, integral-slot	-
No. Of. Machines	-	2	-
Direct Drive
Ratio DD	i_DD	22.5	-
n_85 rated	n_85	11361.8	rpm
Two Gear
Ratio Final Drive	i_FD	22.6	-	User Input, max 7	Naunheimer S. 109		aus Datenblatt
Ratio First Gear	i_1	0.995575	-
Ratio Sec. Gear	i_2	1	-	Gear with most efficiency
n_85_rated	n_85	11412.3	rpm

## Sheet: Axletech EPS785
Axletech EPS785
Parameter	Symbol	Value	Unit	Annotation
Machine type	-	?	-	Assumption: PSM
Power (rated)	P_N	350	kW
rot. Velocity (rated)	n_N	5049.71	1/min	5050
Voltage (rated)	U_N	800V	V	Assumption
Pole pairs	p	4	-	Assumption
Torque (max)		3500
Assumptions	Symbol	Value	Unit	Annotation
rot. Velocity (max)	n_max	8836.99	1/min
power factor	cos_phi	1	-
phase number	m	3	-
Magnet arrangement	-	IPMSM(eingelassen)	-
Circuit-Wiring	-	Star	-	not Delta
Wire-type	-	Round-Wire	-	not Hair-Pin
Cooling Type	-	Liquid	-
Iron material	-	VACOFLUX50	-
Conductor material	-	Copper	-	not aluminum
Winding type	-	Single-Layer, integral-slot	-
No. Of. Machines	-	1	-
Direct Drive
Ratio DD	i_DD	10	-
n_85 rated	n_85	5049.71	rpm
Two Gear
Ratio Final Drive	i_FD	5	-	User Input, max 7	Naunheimer S. 109
Ratio First Gear	i_1	2	-
Ratio Sec. Gear	i_2	1	-	Gear with most efficiency
n_85_rated	n_85	2524.85	rpm

## Sheet: Results
	Sensitivity Driving Cycle
	Consumption kWh/100km
	Vehicle		Truckerrunde	T2030	VECTO LH	VECTO RD		Average	RMS	RMS in %
	DAF		93.477	84.7782	103.505	117.205		99.7414	12.0654	0.120966
	E Force		91.581	91.2894	102.768	118.636		101.069	11.1482	0.110304
	Nikola		101.24	93.9187	114.369	128.6		109.532	13.2244	0.120736
	Nikola 0.8 ratio		95.2347	88.7961	109.413	122.321		103.941	12.9706	0.124788
	Tesla		96.2206	103.513	112.553	123.024		108.828	10.0322	0.0921847
	ZF		95.5401	95.04	107.009	122.533		105.03	11.1818	0.106462
	Average		95.5489	92.8893	108.269	122.053		3.62502
	RMS		2.97131	5.82604	4.30919	3.6353
	RMS in %		0.0310973	0.0627203	0.0398006	0.0297845
	Average Efficiency
	Vehicle		Truckerrunde	T2030	VECTO RD	VECTO LH		Average	RMS	RMS in %
	DAF		0.934928	0.948734	0.929945	0.942729		0.939084	0.00719731	0.00766419
	E Force		0.947069	0.937924	0.943764	0.952934		0.945423	0.005434	0.00574769
	Nikola		0.856971	0.897811	0.838879	0.87165		0.866328	0.0215667	0.0248943
	Tesla		0.912694	0.915675	0.905414	0.916997		0.912695	0.00448334	0.0049122
	ZF		0.893454	0.895791	0.884284	0.799166		0.868174	0.0400729	0.0461577
	Average		0.909023	0.919187	0.900457	0.896695		0.0337569
	RMS		0.0318867	0.0211695	0.0369404	0.0562731
	RMS in %		0.035078	0.0230306	0.0410241	0.062756
	Sensitivity Transmission Design
	Total gear ratio, VECTO LH Cycle							Elasticity 60-80 km/h
		-0.2	-0.1	0	0.1	0.2	RMS in %	-0.2	-0.1	0	0.1	0.2	RMS in %
	DAF	0.948258	0.939476	0.929945	0.909905	0.895315	0.0209899	13.8741	14.3244	13.9536	14.8768	19.5783	0.140829
	E Force	0.957613	0.951049	0.943764	0.91407	0.908129	0.0214233	9.05149	6.79579	8.67215	6.26091	9.11336	0.151122
	Nikola	0.882566	0.860934	0.838879	0.817655	0.794578	0.0369638	6.43472	6.40525	6.70741	6.60958	6.93952	0.0294718
	Tesla	0.930202	0.917966	0.905414	0.891003	0.874899	0.0215623	8.4702	7.43589	6.3362	5.89055	5.95805	0.145834
	ZF	0.912374	0.898145	0.884284	0.848364	0.854134	0.0281481	6.54753	5.80574	5.93288	6.07814	6.64292	0.0538977
	0	Better
	1	Worse
